# Supplementary material
Source: Springer Nature journal article supplement (https://www.springermedizin.de/resource/supplementary/12985_2010_971_MOESM2_ESM.pdf/9608854)

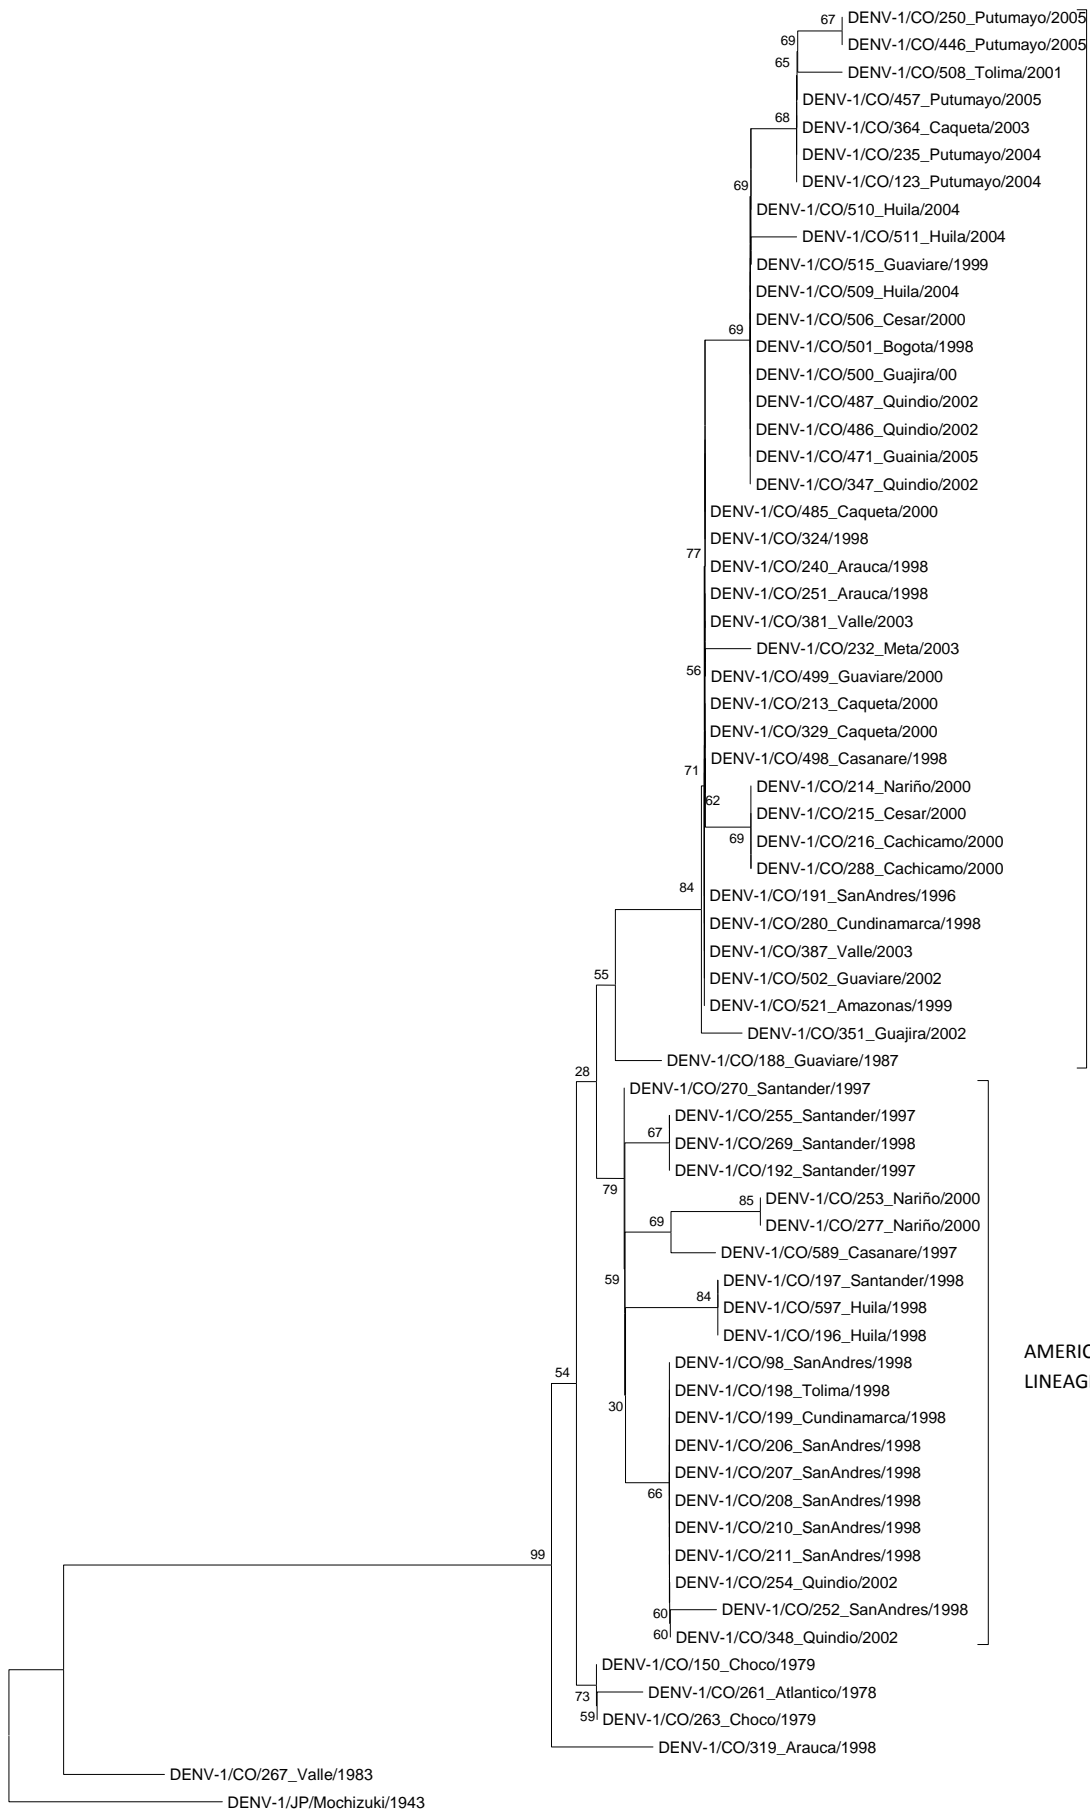

AMERICAN GENOTYPE,  
LINEAGE 2

AMERICAN GENOTYPE,  
LINEAGE 1

Supplement: MOESM2 [file 9608854]
